# Supplementary material for: Propene-bridged cyanurate tetramers decorated on carbon nanosheets with antibacterial activity: insights from molecular modeling and in vitro studies
Source: Royal Society of Chemistry journal article supplement (doi:10.1039/d4lf00120f), 2024-01-01
Supplement: d4lf00120f1.pdf [file d4lf00120f1.pdf]

## Supporting Information

### **Propene Bridged Cyanurate Tetramer Decorated on Carbon Nanosheets with Antibacterial Activity: Insights from Molecular Modeling and In Vitro Studies**

Omnarayan Agrawal<sup>†1</sup>, Hitesh Kumar Sharma<sup>†2</sup>, Radhika Chaurasia<sup>†1</sup>, Gaganjyot Kaur Bakshi<sup>3</sup>,  
Aakanksha Agarwal<sup>1</sup>, Mousumi Sen<sup>4</sup>, Praveen Mamidala<sup>5</sup>, R.K. Dey<sup>6</sup>, Mukesh Chourasia<sup>3\*\*</sup>,  
Monalisa Mukherjee<sup>1\*</sup>

<sup>1</sup>*Amity Institute of Click Chemistry Research and Studies Amity University, Uttar Pradesh,  
Sector- 125, Noida, U.P-201313, India*

<sup>2</sup>*Amity Institute of Pharmacy, Amity University, Uttar Pradesh, Sector- 125, Noida, U.P-201313,  
India*

<sup>3</sup>*Center for Computational Biology and Bioinformatics, Amity Institute of Biotechnology, Amity  
University Uttar Pradesh, Noida 201301, India*

<sup>4</sup>*Amity Institute of Applied Sciences, Amity University, Uttar Pradesh, Sector- 125, Noida, U.P-  
201313*

<sup>5</sup>*Laboratory of Functional Genomics, Department of Biotechnology, Telangana University,  
Nizamabad- 503322, India*

<sup>6</sup>*Department of Chemistry, Central University of Jharkhand, Ranchi-835205, Jharkhand India*

†= equally shared first author

\* Corresponding Author:

Monalisa Mukherjee, E-mail: [mmukherjee@amity.edu](mailto:mmukherjee@amity.edu)

Mobile: +91-9873279964; [Orcid id: 0000-0002-7493-0409](https://orcid.org/0000-0002-7493-0409)

\*\* Co-corresponding Author:

Mukesh Chourasia, E-mail: [mchourasia@amity.edu](mailto:mchourasia@amity.edu)

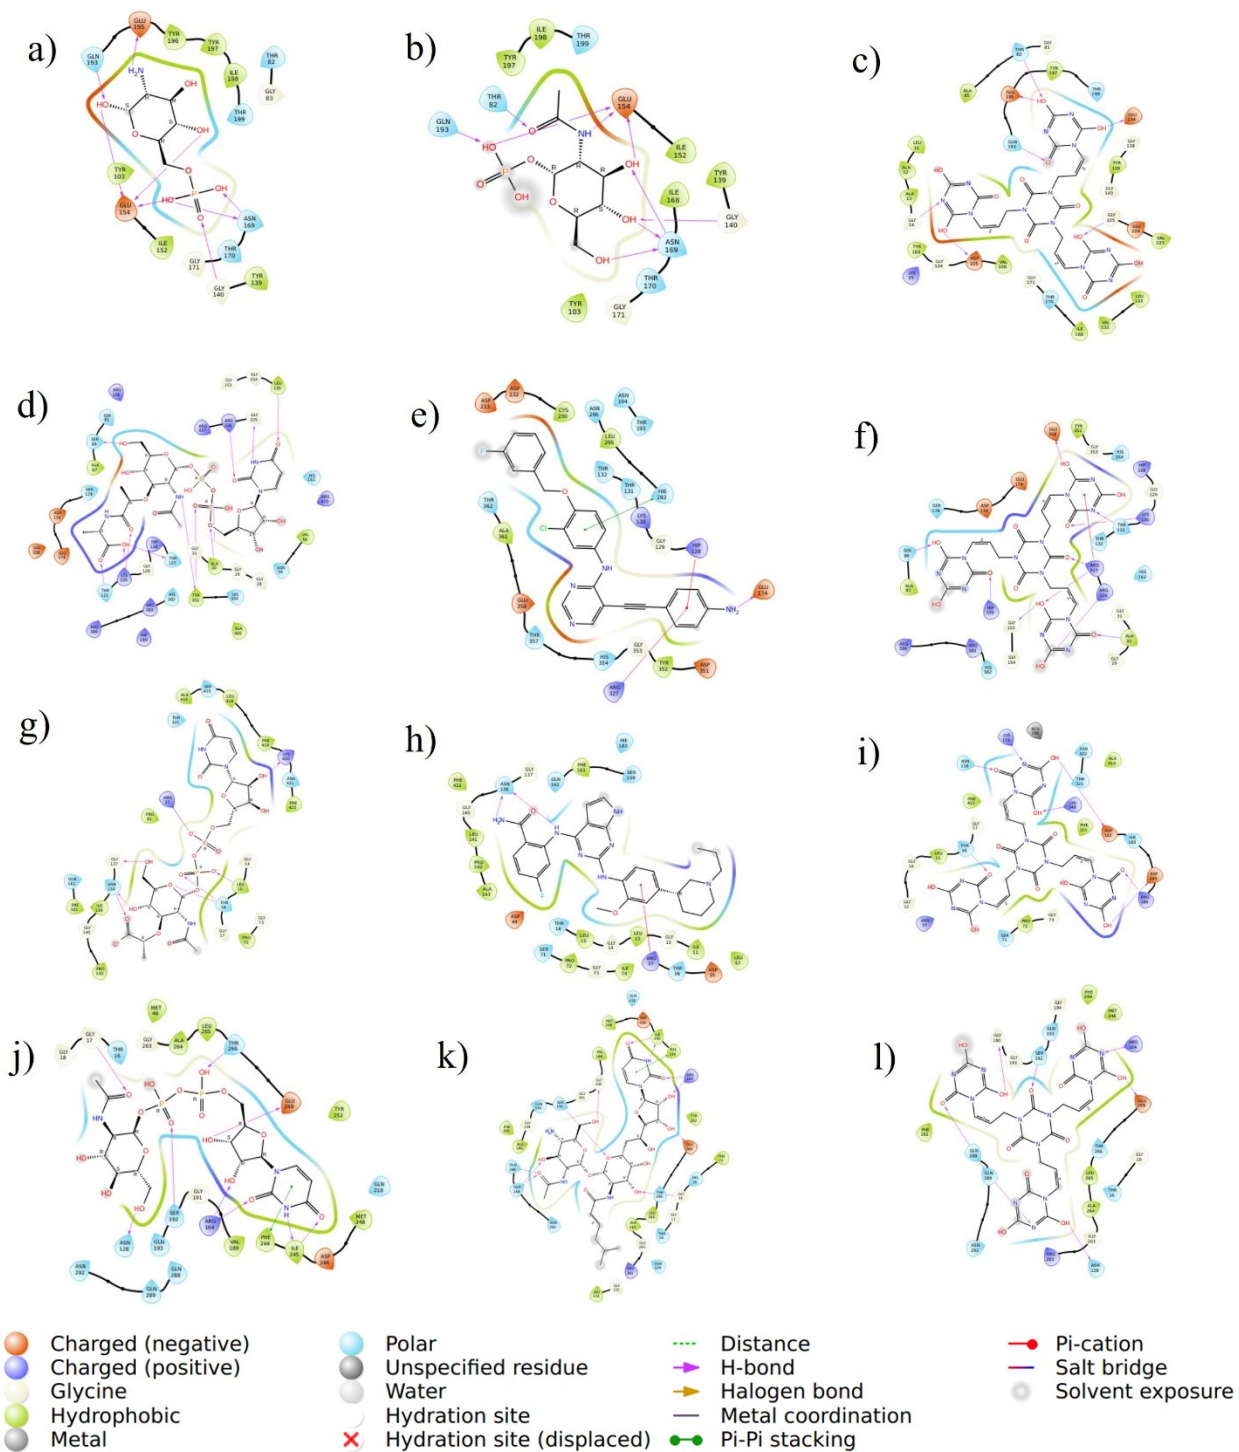

**Figure S1.** 2D Ligand interaction diagram showing major interaction of ligands in the active sites of protein; (a-c) Substrate, inhibitor and PBCT bound to GlmU, (d-f) Substrate, inhibitor and

PBCT bound to MurC, (g-i) Substrate, inhibitor and PBCT bound to MurD and (j-l) Substrate, inhibitor and PBCT bound to MurG.

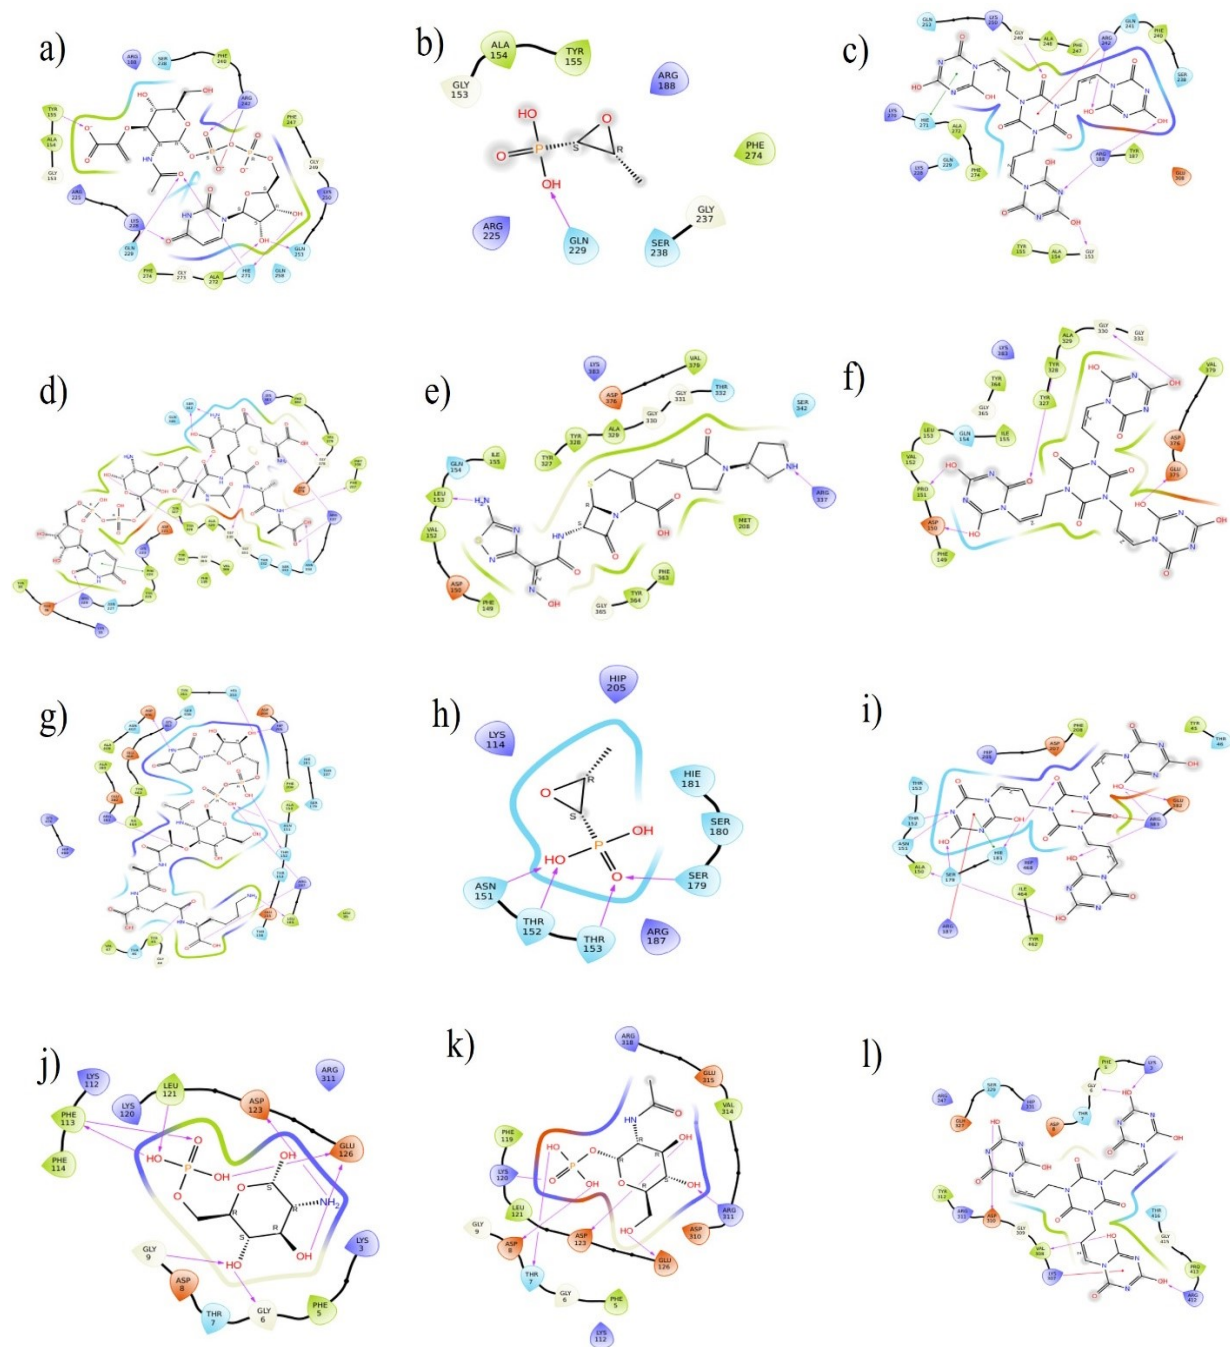

**Figure S2.** 2D Ligand interaction diagram showing major interaction of ligands in the active sites of protein; (a-c) Substrate, inhibitor and PBCT bound to MurB, (d-f) Substrate, inhibitor and PBCT

bound to FemA, (g-i) Substrate, inhibitor and PBCT bound to MurE and (j-l) Substrate, inhibitor and PBCT bound to GlmM.

**Table S1.** SP and XP Docking scores of substrate, inhibitor and PBCT bound to *E. coli* proteins

| Protein/Enzyme | PDB ID | Material/Inhibitor              | SP Score | XP Score |
|----------------|--------|---------------------------------|----------|----------|
| GlmU           | 1HV9   | Glucosamine-6- phosphate        | -5.795   | -7.178   |
|                |        | N-acetylglucosamine-1-phosphate | -6.774   | -8.881   |
|                |        | PBCT                            | -7.463   | -7.025   |
| MurC           | 2F00   | UDP-N-acetyl muramoyl-L-alanine | -7.504   | -10.297  |
|                |        | GW659893X                       | -6.358   | -5.351   |
|                |        | PBCT                            | -6.995   | -7.827   |
| MurD           | 1UAG   | UDP-N-acetylmuramic acid        | -8.351   | -9.709   |
|                |        | GW659893X                       | -7.184   | -6.175   |
|                |        | PBCT                            | -8.523   | -7.217   |
| MurG           | 1NLM   | UDP-N-acetylglucosamine         | -9.849   | -17.498  |
|                |        | Tunicamycin                     | -6.987   | -13.588  |
|                |        | PBCT                            | -8.604   | -7.702   |

**Table S2.** SP and XP Docking scores of substrate, inhibitor and PBCT bound to *S.aureus* proteins

| Protein/Enzyme | PDB ID | Substrate/Inhibitor/Material          | SP Score | XP Score |
|----------------|--------|---------------------------------------|----------|----------|
| GlmM           | 6GYZ   | Glucosamine-6-phosphate               | -6.090   | -8.968   |
|                |        | N-acetylglucosamine-1-phosphate       | -5.366   | -6.395   |
|                |        | PBCT                                  | -7.618   | -5.933   |
| MurB           | 1HSK   | UDP- N-Acetylglucosamine-enolpyruvate | -6.886   | -9.545   |
|                |        | Fosfomycin                            | -4.205   | -3.903   |
|                |        | PBCT                                  | -7.217   | -5.976   |

|      |      |                                                     |        |         |
|------|------|-----------------------------------------------------|--------|---------|
| MurE | 4C13 | UDP- N-acetyl muramoyl-L-Alanyl-D-Glutamyl-L-Lysine | -7.028 | -8.525  |
|      |      | Fosfomycin                                          | -5.001 | -5.800  |
|      |      | PBCT                                                | -6.532 | -7.255  |
| FemA | 1LRZ | UDP-N-acetylmuramic acid pentapeptide               | -9.359 | -12.144 |
|      |      | Ceftobiprole                                        | -7.972 | -4.787  |
|      |      | PBCT                                                | -7.618 | -6.990  |

**Table S3.** Different interactions of substrate, inhibitor and PBCT bound to GlmM (PDB ID: **6GYZ**) of *S. aureus*

| S. NO | Residues | Substrate                                                            | Inhibitor                                             | PBCT                                     |
|-------|----------|----------------------------------------------------------------------|-------------------------------------------------------|------------------------------------------|
| 1.    | LYS3     | -                                                                    | -                                                     | H-Bond (Sidechain, Polar, Donor, Charge) |
| 2.    | GLY6     | H-Bond (Backbone, Acceptor)                                          | -                                                     | H-Bond (Backbone, Acceptor)              |
| 3.    | THR7     | -                                                                    | H-Bond (Backbone, Acceptor)                           | -                                        |
| 4.    | ASP8     | -                                                                    | H-Bond (Backbone, Sidechain, Polar, Acceptor, Charge) | -                                        |
| 5.    | GLY9     | H-Bond (Backbone, Donor)                                             | -                                                     | -                                        |
| 6.    | PHE113   | H-Bond (Backbone, Sidechain, Hydrophobic, Acceptor, Donor, Aromatic) | -                                                     | -                                        |
| 7.    | LYS120   | -                                                                    | H-Bond (Backbone, Sidechain, Polar, Donor, Charge)    | -                                        |
| 8.    | LEU121   | H-Bond (Backbone, Sidechain, Hydrophobic, Donor)                     | -                                                     | -                                        |
| 9.    | ASP123   | H-Bond (Sidechain, Polar, Acceptor,                                  | H-Bond (Sidechain, Polar, Acceptor,                   | -                                        |

|     |        |                                             |                                                    |                                                     |
|-----|--------|---------------------------------------------|----------------------------------------------------|-----------------------------------------------------|
|     |        | Charge)                                     | Charge)                                            |                                                     |
| 10. | GLU126 | H-Bond (Sidechain, Polar, Acceptor, Charge) | H-Bond (Sidechain, Polar, Acceptor, Charge)        | -                                                   |
| 11. | LYS307 | -                                           | -                                                  | Pi-Cation (Sidechain, Polar, Charge)                |
| 12. | VAL308 | -                                           | -                                                  | H-Bond (Backbone, Sidechain, Hydrophobic, Acceptor) |
| 13. | ASP310 | -                                           | -                                                  | H-Bond (Sidechain, Polar, Acceptor, Charge)         |
| 14. | ARG311 | -                                           | H-Bond (Backbone, Sidechain, Polar, Donor, Charge) | -                                                   |
| 15. | ARG412 | -                                           | -                                                  | H-Bond (Sidechain, Polar, Donor, Charge)            |

**Table S4.** Different interactions of substrate, inhibitor and PBCT bound to MurB (**PDB ID: 1HSK**) of *S. aureus*

| S. No | Residues | Substrate                                           | Inhibitor                        | PBCT                                                   |
|-------|----------|-----------------------------------------------------|----------------------------------|--------------------------------------------------------|
| 1.    | GLY153   |                                                     |                                  | H-Bond (Backbone, Acceptor)                            |
| 2.    | TYR155   | H-Bond (Backbone, Sidechain, Hydrophobic, Aromatic) |                                  |                                                        |
| 3.    | ARG188   |                                                     |                                  | H-Bond (Sidechain, Polar, Donor, Charged)              |
| 4.    | GLN229   | H-Bond (Sidechain, Polar, Donor)                    | H-Bond (Sidechain, Polar, Donor) |                                                        |
| 5.    | ARG242   | H-Bond (Sidechain, Polar, Donor, Charged)           |                                  | H-Bond, P-cation (Backbone, Sidechain, Polar, Charged) |
| 6.    | GLY249   |                                                     |                                  | H-Bond (Backbone, Donor)                               |
| 7.    | GLN253   | H-Bond (Sidechain, Polar)                           |                                  |                                                        |

|    |        |                                                      |  |                                             |
|----|--------|------------------------------------------------------|--|---------------------------------------------|
| 8. | HIE271 | H-Bond (Backbone, Sidechain, Polar, Acceptor, Donor) |  | Pi-Pi Stacking (Backbone, Sidechain, Polar) |
| 9. | ALA272 | H-Bond (Backbone, Sidechain, Hydrophobic)            |  |                                             |

**Table S5.** Different interactions of substrate, inhibitor and PBCT bound to MurE (**PDB ID: 4C13**) of *S. aureus*

| S. No. | Residues | Substrate                                                  | Inhibitor                                  | PBCT                                                       |
|--------|----------|------------------------------------------------------------|--------------------------------------------|------------------------------------------------------------|
| 1.     | TYR45    | H-Bond (Backbone, Sidechain, Hydrophobic, Donor, Aromatic) |                                            |                                                            |
| 2.     | ALA150   |                                                            |                                            | H-Bond (Backbone, Acceptor)                                |
| 3.     | ASN151   | H-Bond (Backbone, Sidechain, Polar, Donor)                 | H-Bond (Backbone, Sidechain, Polar, Donor) | H-Bond (Backbone, Sidechain, Polar, Donor)                 |
| 4.     | THR152   | H-Bond (Backbone, Sidechain, Polar, Acceptor)              | H-Bond (Backbone, Sidechain, Polar, Donor) | H-Bond (Backbone, Sidechain, Polar, Donor)                 |
| 5.     | THR153   |                                                            | H-Bond (Backbone)                          |                                                            |
| 6.     | SER179   |                                                            |                                            | H-Bond (Sidechain, Polar, Donor)                           |
| 7.     | HIE181   |                                                            |                                            | H-Bond, Pi-Pi Stacking (Sidechain, Polar, Acceptor, Donor) |
| 8.     | LEU185   | H-Bond (Backbone, Sidechain, Hydrophobic, Acceptor)        | H-Bond                                     |                                                            |
| 9.     | ARG187   | H-Bond (Sidechain, Polar, Donor, Charged)                  |                                            | Pi-cation (Sidechain, Polar, Charged)                      |
| 10.    | HIP205   | H-Bond (Sidechain, Donor, Charged)                         |                                            |                                                            |
| 11.    | HIS353   | H-Bond (Sidechain, Polar, Acceptor)                        |                                            |                                                            |

|     |        |                                             |  |                                                                   |
|-----|--------|---------------------------------------------|--|-------------------------------------------------------------------|
| 12. | GLU382 |                                             |  | H-Bond, Pi-cation (Backbone, Sidechain, Polar, Acceptor, Charged) |
| 13. | ARG383 | H-Bond (Sidechain, Polar, Charged)          |  | H-Bond (Sidechain, Polar, Donor, Charged)                         |
| 14. | ASP406 | H-Bond Sidechain, Polar, Acceptor, Charged) |  |                                                                   |

**Table S6.** Different interactions of substrate, inhibitor and PBCT bound to FemA (PDB ID: 1LRZ) of *S. aureus*

| S. No. | Residues | Substrate                                                     | Inhibitor                   | PBCT                                                       |
|--------|----------|---------------------------------------------------------------|-----------------------------|------------------------------------------------------------|
| 1.     | GLU36    | H-Bond (Sidechain, Polar, Acceptor, Charged)                  |                             |                                                            |
| 2.     | ASP150   |                                                               |                             | H-Bond (Backbone, Acceptor)                                |
| 3.     | Pro151   |                                                               |                             | H-Bond (Backbone)                                          |
| 4.     | LEU153   |                                                               | H-Bond (Backbone, Acceptor) |                                                            |
| 5.     | PHE207   | H-Bond (Backbone, Acceptor)                                   |                             |                                                            |
| 6.     | PHE224   | Pi-Pi Stacking (Backbone, Sidechain, Hydrophobic, Aromatic)   |                             |                                                            |
| 7.     | ARG228   | H-Bond (Sidechain, Polar, Donor, Charged)                     |                             |                                                            |
| 8.     | TYR327   | H-Bond (Sidechain, Hydrophobic, Donor, Aromatic)              |                             |                                                            |
| 9.     | TYR328   | H-Bond (Backbone, Sidechain, Hydrophobic, Acceptor, Aromatic) |                             | H-Bond (Backbone, Sidechain, Hydrophobic, Donor, Aromatic) |



|     |        |                                           |                                           |                                                        |
|-----|--------|-------------------------------------------|-------------------------------------------|--------------------------------------------------------|
| 10. | GLY330 | H-Bond (Backbone, Acceptor)               |                                           | H-Bond (Backbone, Acceptor)                            |
| 11. | ARG337 | H-Bond (Sidechain, Polar, Donor, Charged) | H-Bond (Sidechain, Polar, Donor, Charged) |                                                        |
| 12. | SER342 | H-Bond (Sidechain, Polar, Acceptor)       |                                           |                                                        |
| 13. | GLU375 |                                           |                                           | H-Bond (Backbone, Sidechain, Polar, Acceptor, Charged) |
| 14. | GLY378 | H-Bond (Backbone, Acceptor)               |                                           |                                                        |

**Table S7.** Different interactions of substrate, inhibitor and PBCT bound to GlmU (**PDB ID: 1HV9**) of *E.coli*

| S. NO | Residues | Substrate                                            | Inhibitor                                            | PBCT                                         |
|-------|----------|------------------------------------------------------|------------------------------------------------------|----------------------------------------------|
| 1.    | GLY14    |                                                      |                                                      | H-Bond (Backbone)                            |
| 2.    | THR82    |                                                      | H-Bond (Sidechain, Polar, Donor)                     | H-Bond (Backbone, Sidechain, Polar)          |
| 3.    | ASP105   |                                                      |                                                      | H-Bond (Sidechain, Polar, Acceptor, Charged) |
| 4.    | GLY140   | H-Bond (Backbone, Donor)                             | H-Bond (Backbone, Donor)                             |                                              |
| 5.    | GLU154   | H-Bond (Sidechain, Polar, Acceptor, Charged)         | H-Bond (Sidechain, Polar, Acceptor, Charged)         | H-Bond (Sidechain, Polar, Acceptor, Charged) |
| 6.    | ASN169   | H-Bond (Backbone, Sidechain, Polar, Acceptor, Donor) | H-Bond (Backbone, Sidechain, Polar, Acceptor, Donor) |                                              |
| 7.    | GLN193   | H-Bond (Sidechain, Polar)                            | H-Bond (Sidechain, Polar, Donor)                     | H-Bond (Sidechain, Polar, Donor)             |
| 8.    | GLU195   | H-Bond (Sidechain, Polar, Acceptor, Charged)         |                                                      | H-Bond (Sidechain, Polar, Acceptor, Charged) |
| 9.    | GLY225   |                                                      |                                                      | H-Bond (Backbone,                            |

|  |  |  |  |        |
|--|--|--|--|--------|
|  |  |  |  | Donor) |
|--|--|--|--|--------|

**Table S8.** Different interactions of substrate, inhibitor and PBCT bound to MurC (PDB ID: 2F00) of *E.coli*

| S. NO | Residues | Substrate                                           | Inhibitor                                    | PBCT                                          |
|-------|----------|-----------------------------------------------------|----------------------------------------------|-----------------------------------------------|
| 1.    | ALA30    | H-Bond (Backbone, Sidechain, Hydrophobic)           |                                              | H-Bond (Backbone)                             |
| 2.    | SER86    | H-Bond (Backbone, Sidechain, Polar, Acceptor)       |                                              | H-Bond (Sidechain, Polar, Donor)              |
| 3.    | THR127   | H-Bond (Backbone, Acceptor)                         |                                              |                                               |
| 4.    | HIP128   |                                                     | Pi-cation (Backbone, Sidechain, Charged)     |                                               |
| 5.    | LYS130   | H-Bond (Backbone, Sidechain, Polar, Donor, Charged) |                                              | H-Bond (Backbone, Sidechain, Polar, Charged)  |
| 6.    | THR131   | H-Bond (Backbone, Sidechain, Polar)                 |                                              |                                               |
| 7.    | GLY153   |                                                     |                                              | H-Bond (Backbone, Acceptor)                   |
| 8.    | LEU155   | H-Bond (Backbone, Sidechain, Hydrophobic, Donor)    |                                              |                                               |
| 9.    | GLU174   |                                                     | H-Bond (Sidechain, Polar, Acceptor, Charged) |                                               |
| 10.   | HIS199   |                                                     |                                              | H-Bond (Sidechain, Donor, Charged)            |
| 11.   | HIE292   |                                                     | Pi-Pi Stacking (Backbone, Sidechain, Polar)  |                                               |
| 12.   | GLY325   | H-Bond (Backbone, Acceptor)                         |                                              |                                               |
| 13.   | ARG326   | H-Bond (Sidechain, Polar, Donor, Charged)           |                                              | H-Bond, Pi-cation (Sidechain, Polar, Charged) |
| 14.   | ARG327   |                                                     | Pi-cation (Sidechain, Polar, Charged)        | H-Bond (Sidechain, Polar, Donor, Charged)     |
| 15.   | TYR352   | H-Bond (Sidechain, Hydrophobic, Donor, Aromatic)    |                                              |                                               |
| 16.   | GLU358   |                                                     |                                              | H-Bond (Sidechain, Polar, Acceptor, Charged)  |

**Table S9.** Different interactions of substrate, inhibitor and PBCT bound to MurD (**PDB ID: 1UAG**) of *E.coli*

| S. NO | Residues | Substrate                                            | Inhibitor                                     | PBCT                                         |
|-------|----------|------------------------------------------------------|-----------------------------------------------|----------------------------------------------|
| 1.    | LEU15    | H-Bond (Backbone, Sidechain, Hydrophobic, Donor)     |                                               |                                              |
| 2.    | THR16    | H-Bond (Backbone, Sidechain, Polar, Donor)           | H-Bond (Backbone, Sidechain, Polar, Donor)    | H-Bond (Backbone, Sidechain, Polar, Donor)   |
| 3.    | THR36    |                                                      | H-Bond (Backbone, Sidechain, Polar, Acceptor) |                                              |
| 4.    | ARG37    | Salt bridge (Sidechain, Polar, Donor, Charged)       |                                               |                                              |
| 5.    | LYS115   |                                                      |                                               | H-Bond (Sidechain, Polar, Donor, Charged)    |
| 6.    | GLY137   | H-Bond (Backbone, Acceptor)                          |                                               |                                              |
| 7.    | ASN138   | H-Bond (Backbone, Sidechain, Polar, Acceptor, Donor) |                                               | H-Bond (Sidechain, Polar, Donor)             |
| 8.    | ASP182   |                                                      |                                               | H-Bond (Sidechain, Polar, Acceptor, Charged) |
| 9.    | ASP185   |                                                      |                                               | H-Bond (Sidechain, Polar, Acceptor, Charged) |
| 10.   | ARG186   |                                                      |                                               | H-Bond (Sidechain, Polar, Donor, Charged)    |
| 11.   | LYS348   |                                                      |                                               | H-Bond (Sidechain, Polar, Donor, Charged)    |
| 12.   | LYS420   | H-Bond (Backbone, Acceptor)                          |                                               |                                              |

**Table S10.** Different interactions of substrate, inhibitor and PBCT bound to MurG (**PDB ID: 1NLM**) of *E.coli*

| <b>S. NO</b> | <b>Residues</b> | <b>Substrate</b>                                            | <b>Inhibitor</b>                                            | <b>PBCT</b>                                  |
|--------------|-----------------|-------------------------------------------------------------|-------------------------------------------------------------|----------------------------------------------|
| 1.           | GLY17           | H-Bond (Backbone, Donor)                                    |                                                             |                                              |
| 2.           | GLY18           |                                                             | H-Bond (Backbone, Donor)                                    |                                              |
| 3.           | ASN128          |                                                             |                                                             | H-Bond (Sidechain, Polar)                    |
| 4.           | ARG164          | H-Bond (Sidechain, Polar, Donor, Charged)                   | H-Bond (Sidechain, Polar, Donor, Charged)                   | H-Bond (Sidechain, Polar, Charged)           |
| 5.           | GLY190          |                                                             | H-Bond (Backbone, Acceptor)                                 | H-Bond (Backbone, Acceptor)                  |
| 6.           | SER192          | H-Bond (Backbone, Sidechain, Polar, Donor)                  | H-Bond (Backbone, Sidechain, Polar)                         | H-Bond (Backbone, Sidechain, Polar, Donor)   |
| 7.           | PHE244          | Pi-Pi Stacking (Backbone, Sidechain, Hydrophobic, Aromatic) | Pi-Pi Stacking (Backbone, Sidechain, Hydrophobic, Aromatic) |                                              |
| 8.           | ILE245          | H-Bond (Backbone, Sidechain, Hydrophobic, Acceptor, Donor)  | H-Bond (Backbone, Sidechain, Hydrophobic, Acceptor, Donor)  |                                              |
| 9.           | THR266          | H-Bond (Backbone, Sidechain, Polar, Donor)                  |                                                             |                                              |
| 10.          | GLU269          | H-Bond (Sidechain, Polar, Acceptor, Charged)                | H-Bond (Sidechain, Polar, Acceptor, Charged)                | H-Bond (Sidechain, Polar, Acceptor, Charged) |
| 11.          | GLN288          |                                                             | H-Bond (Sidechain, Polar, Donor)                            |                                              |
| 12.          | GLN289          |                                                             | H-Bond (Sidechain, Polar, Donor)                            | H-Bond (Sidechain, Polar, Donor)             |

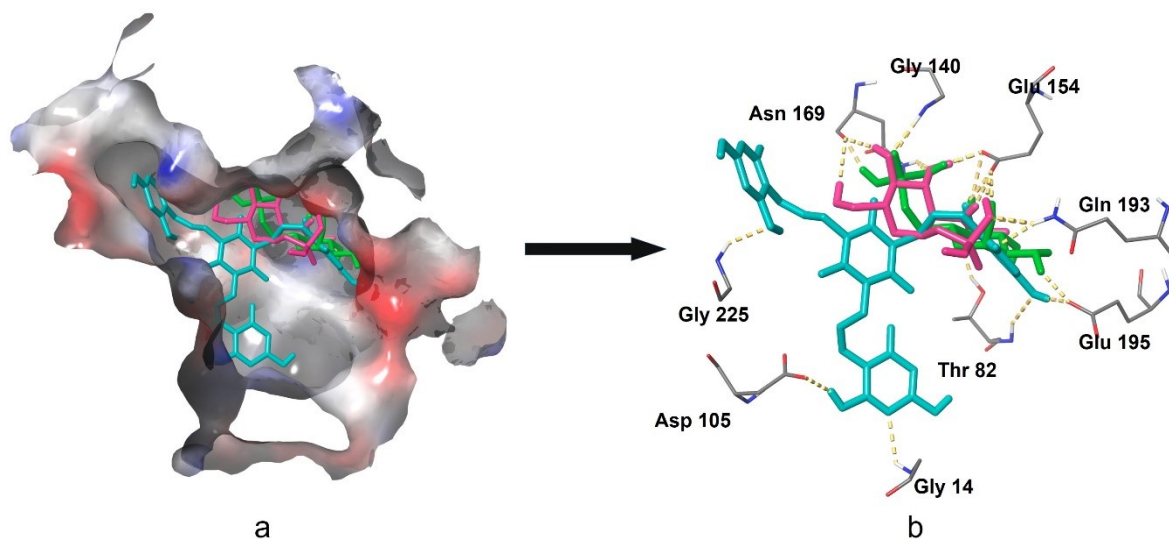

**Figure S3.** Orientation of docked ligands in the binding site of GlmU. The binding site of the GlmU cavity is represented by electrostatic potential surface (a). Ligands are shown in different colours; PBCT (cyan), Substrate (green) and inhibitor (pink). The residues of binding site and ligands are represented by thin and thick tubes, respectively. H-bonds are represented by yellow dotted lines (b).

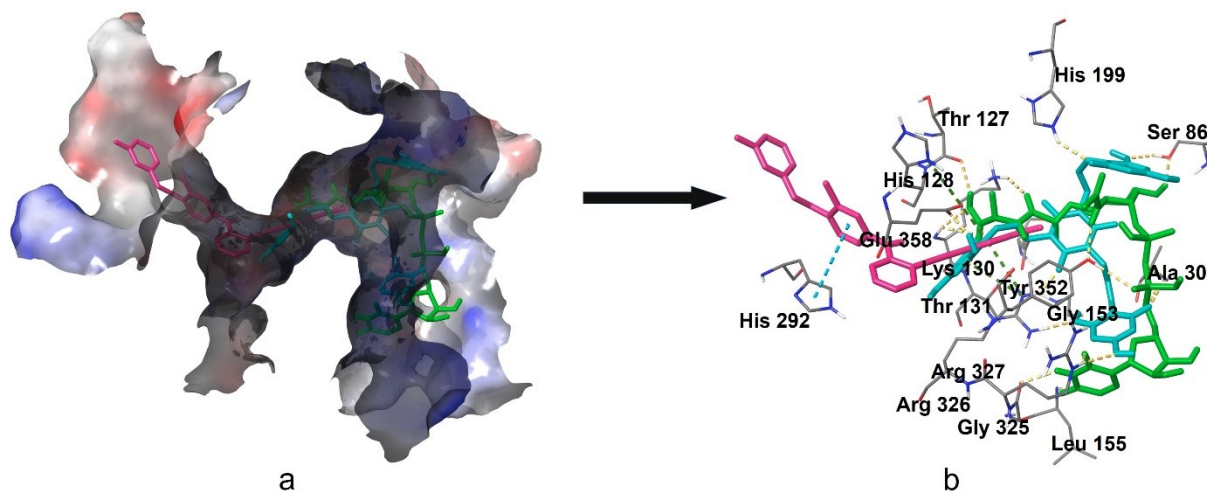

**Figure S4.** Orientation of docked ligands in the binding site of MurC. The binding site of the MurC cavity is represented by electrostatic potential surface (a). Ligands are shown in different colours; PBCT (cyan), Substrate (green) and inhibitor (pink). The residues of binding site and ligands are represented by thin and thick tubes, respectively. H-bonds and  $\pi$ - $\pi$  interactions are represented by yellow and cyan dotted lines, respectively and cation- $\pi$  interactions are shown with green dotted lines (b).

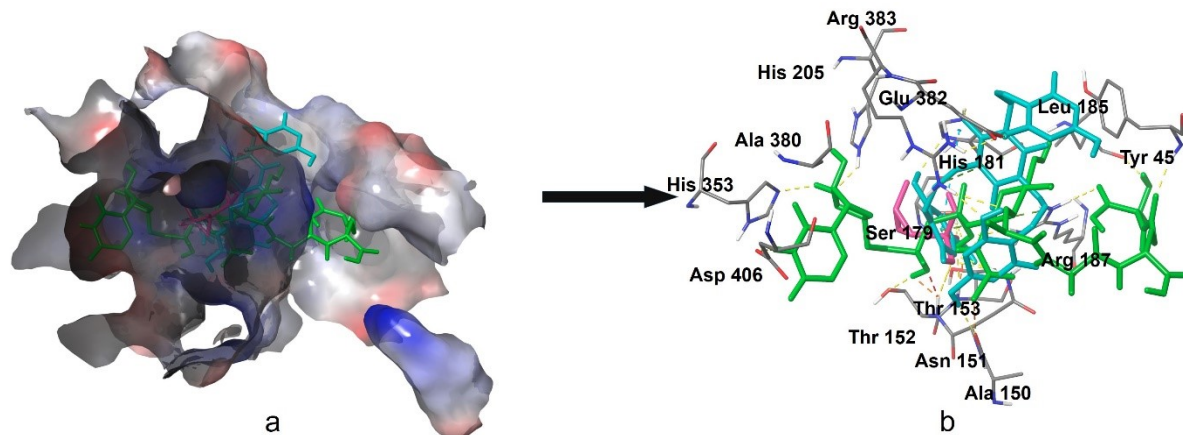

**Figure S5.** Orientation of docked ligands in the binding site of MurE. The binding site of the MurE cavity is represented by electrostatic potential surface (a). Ligands are shown in different colours; PBCT (cyan), Substrate (green) and inhibitor (pink). The residues of binding site and ligands are represented by thin and thick tubes, respectively. H-bonds and  $\pi$ - $\pi$  interactions are represented by yellow and cyan dotted lines, respectively and cation- $\pi$  interactions are shown with green dotted lines (b).

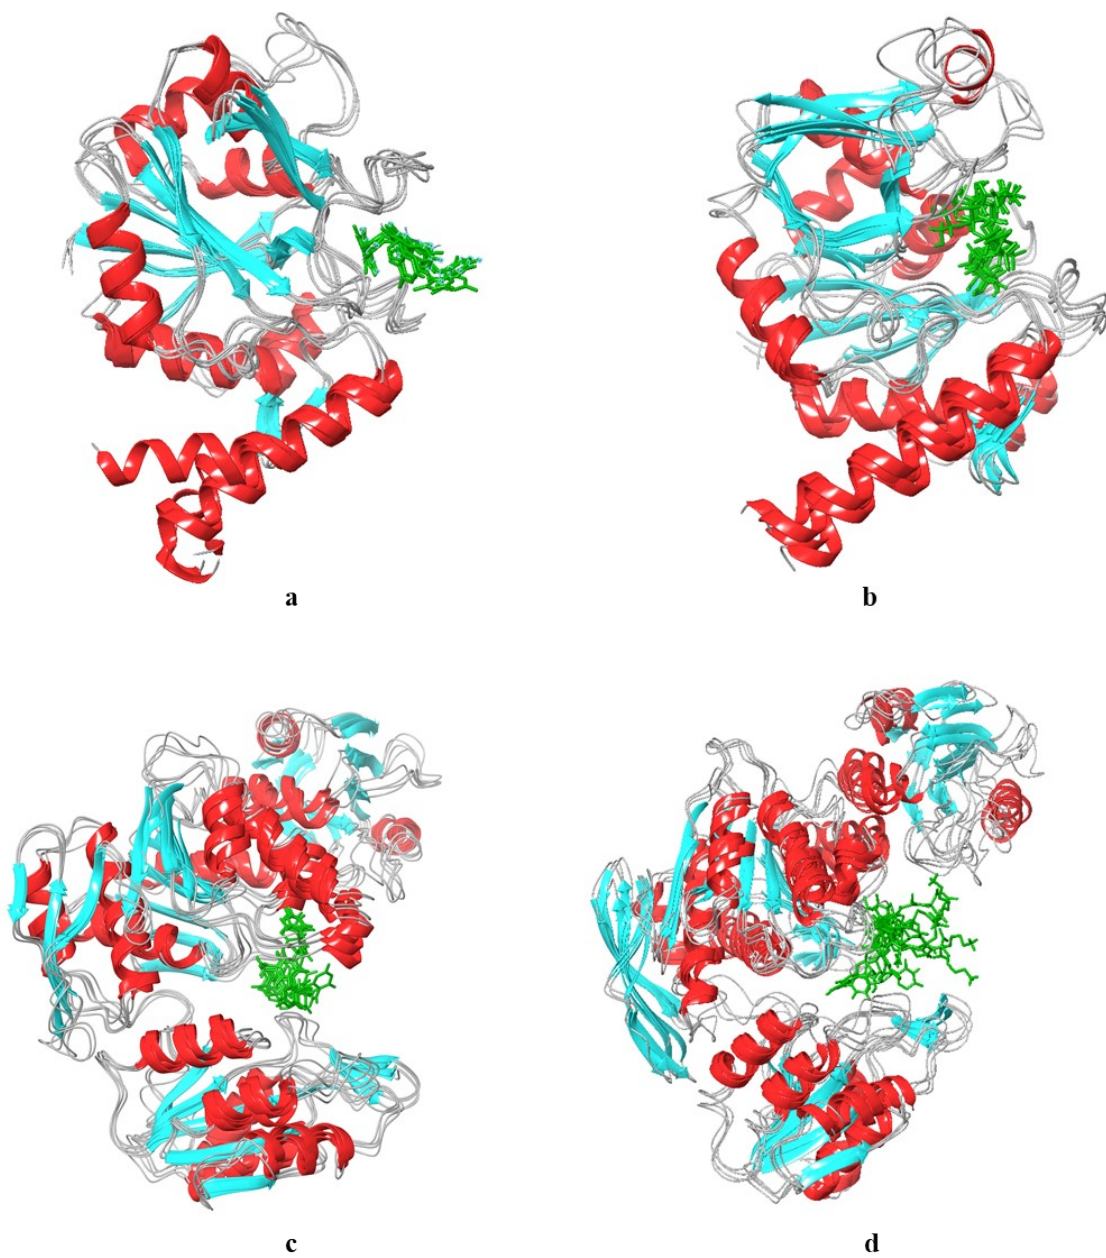

**Figure S6.** Conformational ensemble consisting of 4 conformations obtained after RMSD clustering of 500ns trajectory (a) GlmU with PBCT and (b) GlmU with substrate (c) MurE with PBCT and (d) MurE with substrate.

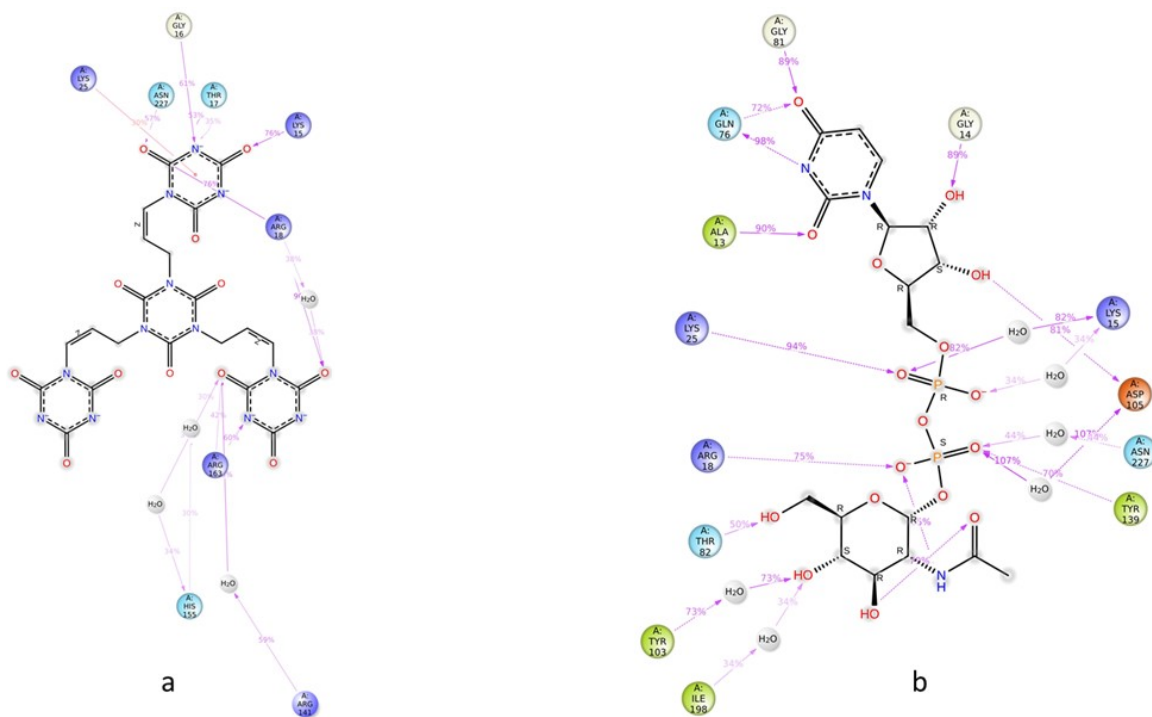

**Figure S7.** 2D intermolecular interactions between *E. coli* protein (PDB ID: 1HV9) and (a) PBCT and (b) substrate.



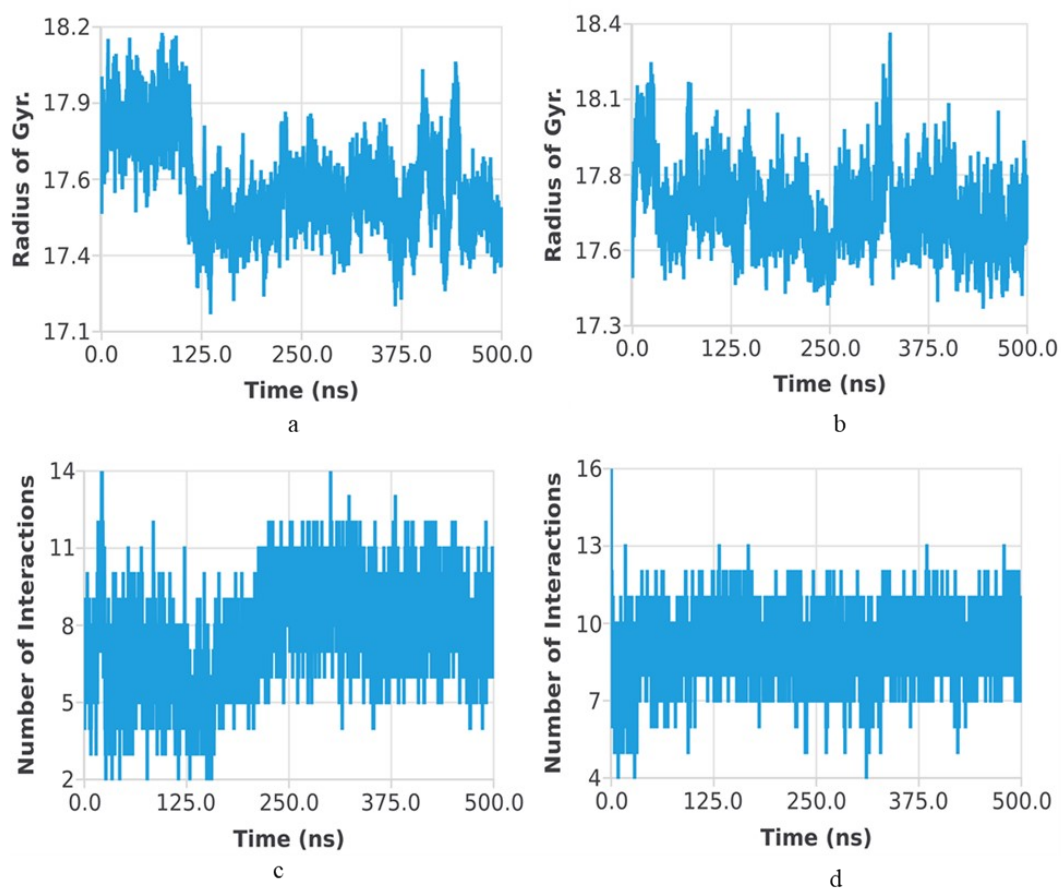

**Figure S8.** Plot of the Radius of Gyration of *E. coli* protein (PDB ID: 1HV9) with (a) PBCT and (b) substrate. Plot of number of hydrogen bonds observed in the complex of GlmU and (c) PBCT and (d) substrate during 500ns MD Simulation

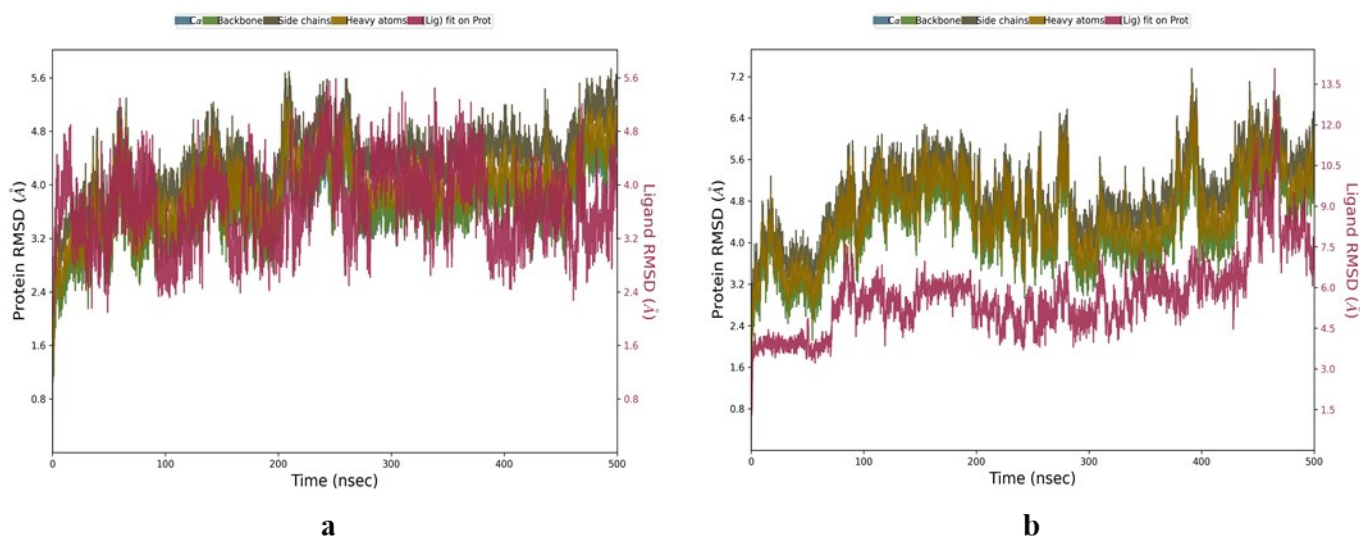

**Figure S9.** Structure and interaction analysis of MD simulation trajectories obtained for *E. coli*

protein (PDB ID:2F00) (a) The RMSD plot of MurC with PBCT and (b) with substrate. The simulation time of 500 ns showing the formation of stable complex without any significant conformational changes in protein structure.

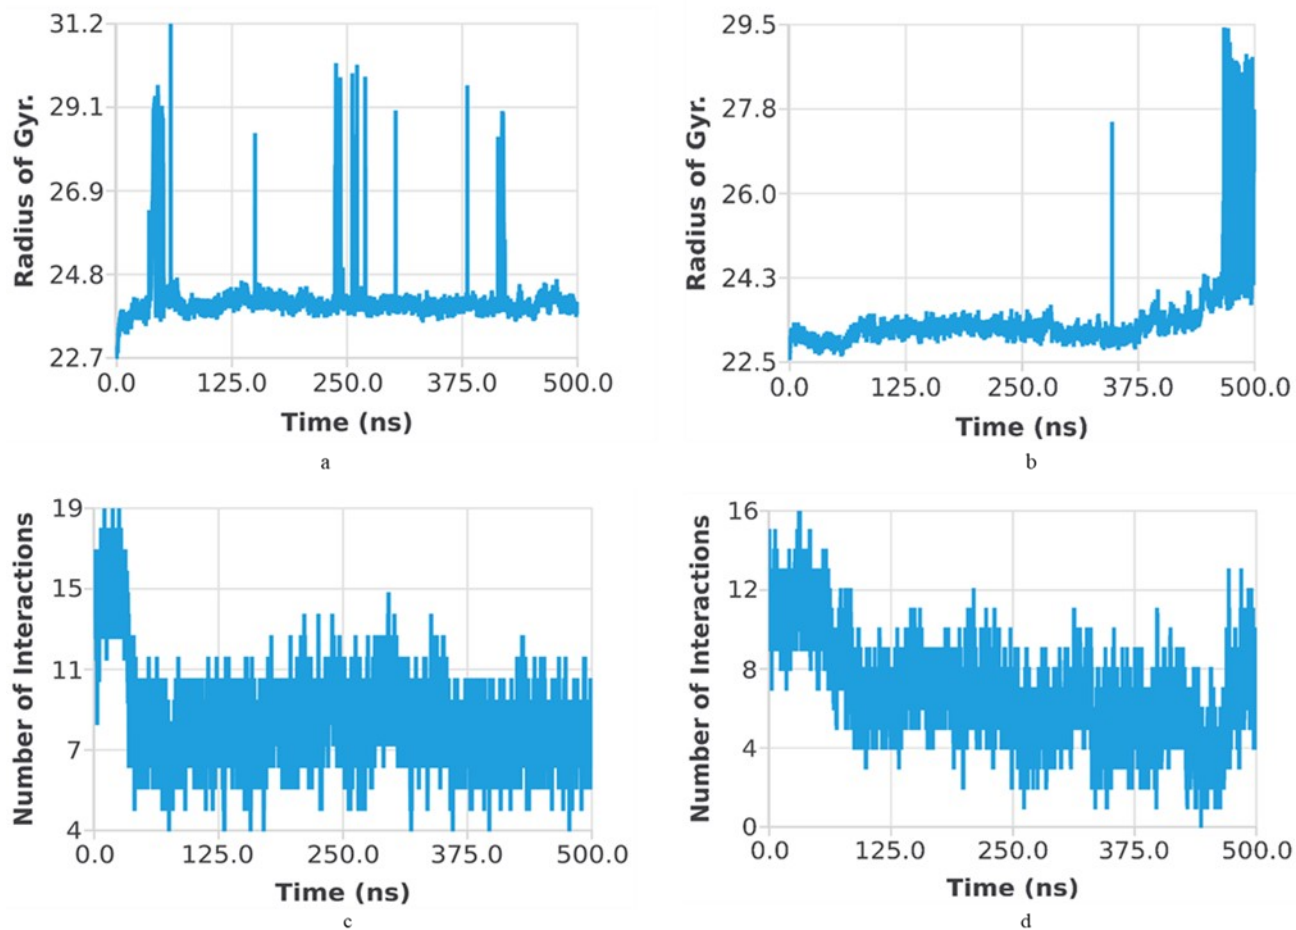

**Figure S10.** Plot of the Radius of Gyration of *E. coli* protein (PDB ID: 2F00) with (a) PBCT and (b) substrate. Plot of number of hydrogen bonds observed in the complex of MurC and (c) PBCT and (d) substrate during 500ns MD Simulation.

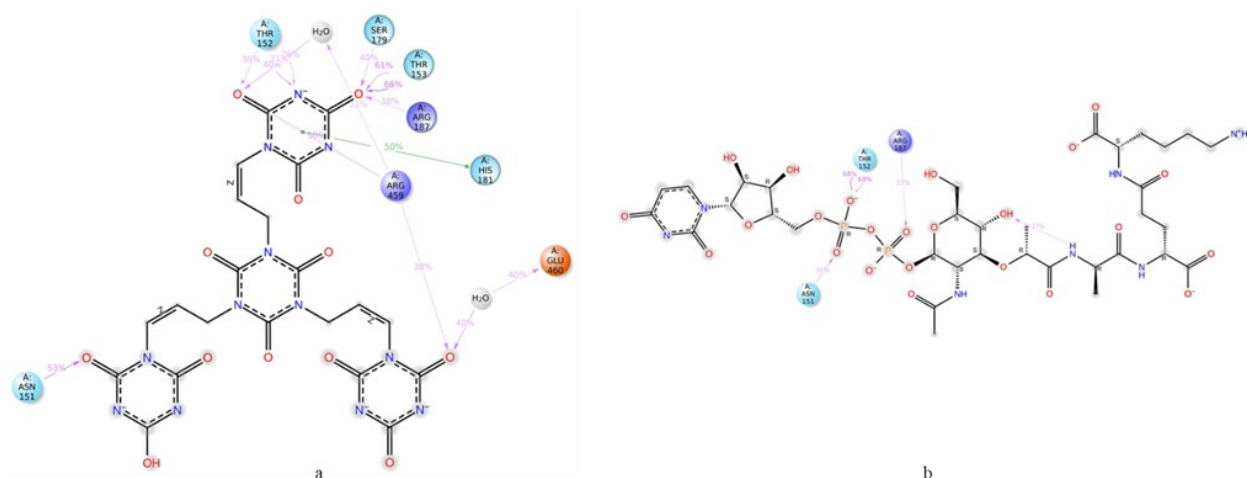

**Figure S11.** 2D intermolecular interactions between *S. aureus* protein (PDB ID: 4C13) and (a) PBCT and (b) substrate.

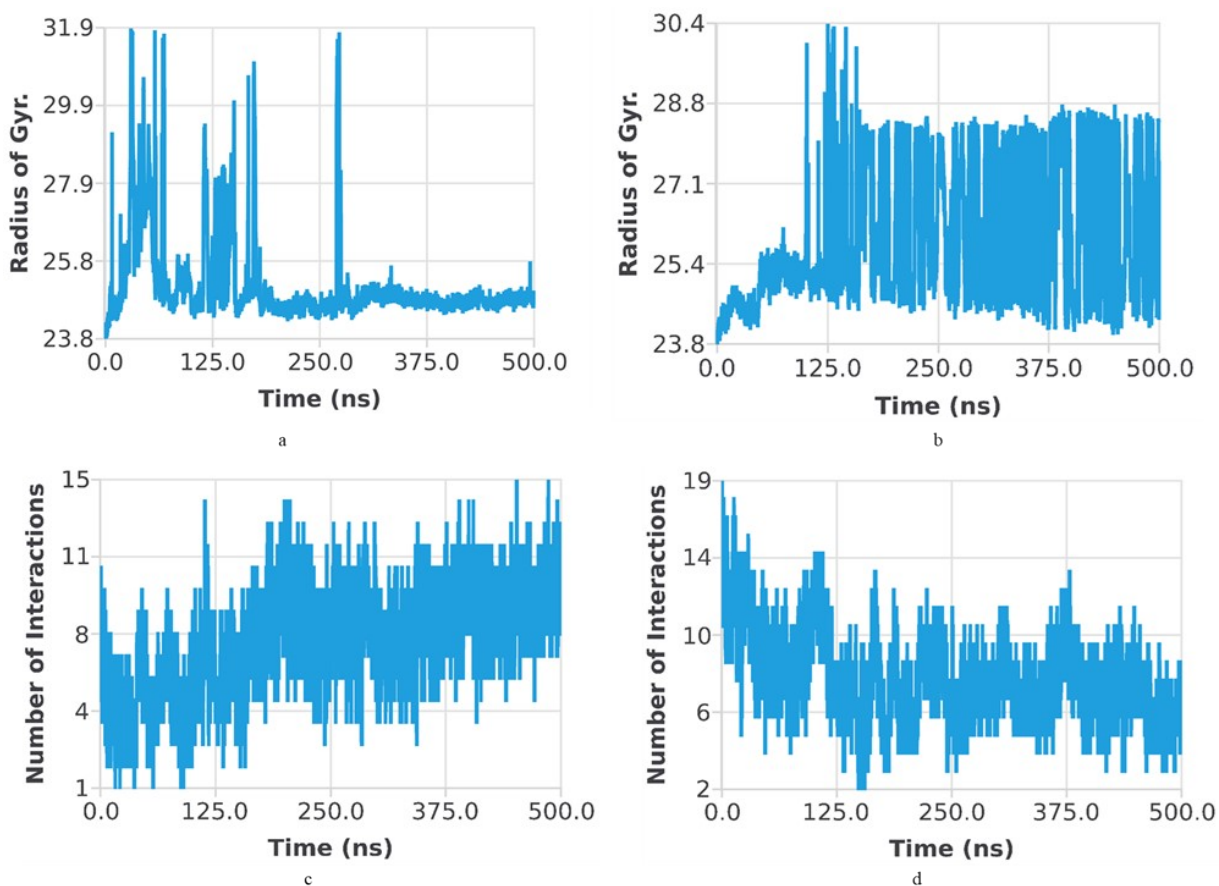

**Figure S12.** Plot of the Radius of Gyration of *S. aureus* protein (PDB ID: 4C13) with (a) PBCT and (b) substrate. Plot of number of hydrogen bonds observed in the complex of MurE and (c) PBCT and (d) substrate during 500ns MD Simulation.

## Characterization of Mesenchymal Stem Cells

The presences of MSCs were further confirmed via flow cytometry against the antibodies CD19 FITC (negative marker) and CD44 PE (positive marker). From the scattered plots, the auto showed no cells in either MSC negative or positive marker's quadrants (Q1 and Q4 respectively) (**Figure S13a**). In positive sample (PS), labeled with CD44 PE showed more than 80% population of cells in Q1 (**Figure S13b**), while less than 3% were labeled with CD19 FITC in Q4 the negative sample (NS) (**Figure 3c**). Moreover, in the test group (**Figure S13d**), a significant ( $p$ -value<0.001) (**Figure S13e**) population of PS labeled with CD44 PE (Q1) was observed, suggesting that the isolated cells are MSCs only and exclusively expressing CD44 marker.

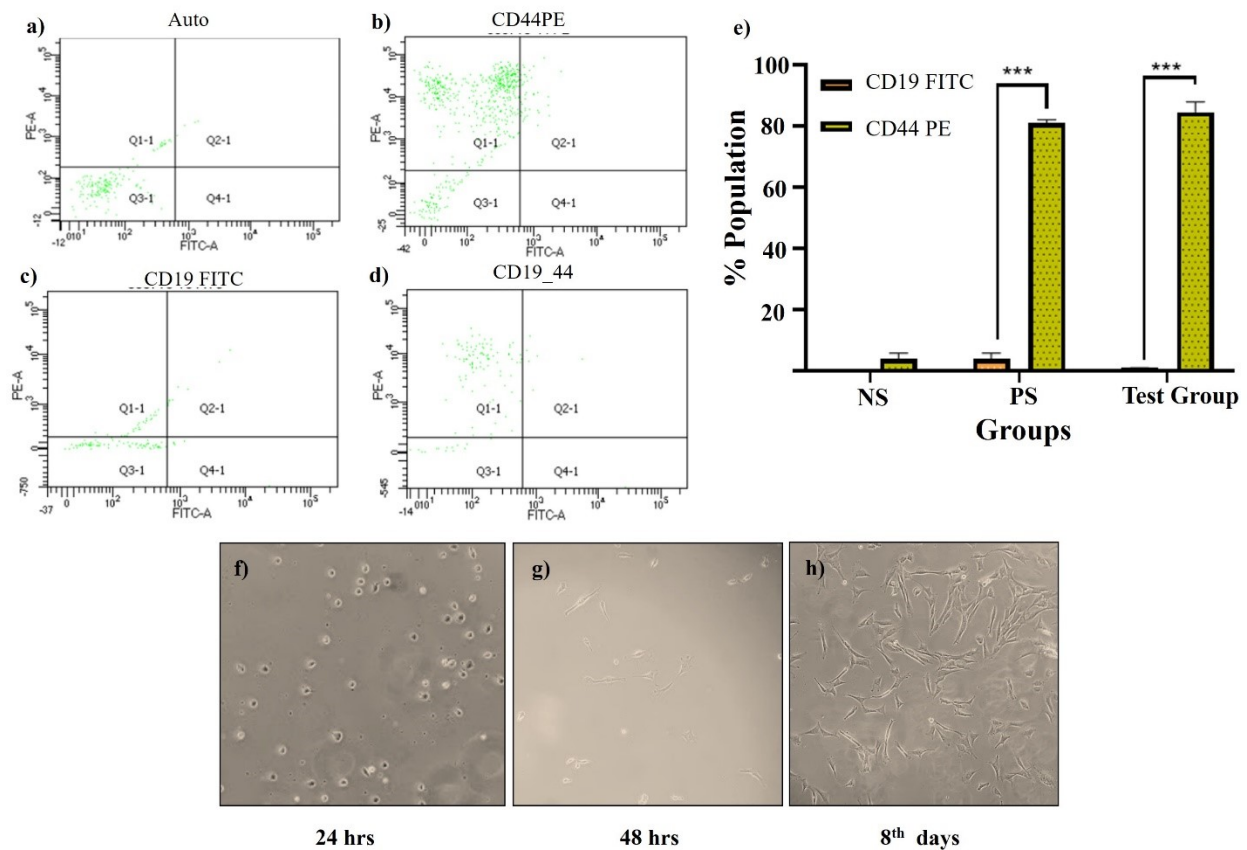

**Figure S13** (a-d) Flow cytometry characterization of MSCs. (a) Auto, (b) CD44PE (positive marker), (c) CD19 FITC (negative marker), (d) Dual (CD19/CD44), (f) PE-FITC mean bar graph (\*\*\*) ( $p$ -value<0.001). Microscopic images of the growth of MSCs from day 1 to 8. The development of elongated spindle shaped adhered MSCs can be observed over the course of 14 days, which eventually took a month to reach ~70% confluency.

**Table S11:** Reduction in cell viability of *S. aureus* upon the exposure CNH-4 and CNH-24.

|                                                       | <b>Time<br/>(h)</b> | <b>Control</b> | <b>½<br/>MIC</b> | <b>MIC</b> | <b>2MIC</b> | <b>4MIC</b> |
|-------------------------------------------------------|---------------------|----------------|------------------|------------|-------------|-------------|
| <b>Cell viability in Log10<br/>CFU/mL with CNH-4</b>  | 0                   | 5.47           | 5.62             | 5.52       | 5.48        | 5.27        |
|                                                       | 4                   | 6.27           | 5.29             | 5.21       | 5.02        | 4.38        |
|                                                       | 8                   | 7.4            | 4.81             | 4.62       | 4.3         | 3.3         |
|                                                       | 16                  | 9.1            | 4.32             | 4.1        | 3.6         | 2.3         |
|                                                       | 24                  | 10.24          | 4.13             | 3.94       | 3.59        | 2           |
| <b>Cell viability in Log10<br/>CFU/mL with CNH-24</b> | 0                   | 5.22           | 5.13             | 4.99       | 4.95        | 4.87        |
|                                                       | 4                   | 5.97           | 5.16             | 4.93       | 4.72        | 3.69        |
|                                                       | 8                   | 8.35           | 4.05             | 3.82       | 3.38        | 2.47        |
|                                                       | 16                  | 9.3            | 3.76             | 3.54       | 3.14        | 1.3         |
|                                                       | 24                  | 10.19          | 3.69             | 3.3        | 3           | 1           |
| <b>Cell viability in Log10<br/>CFU/mL with CNH-48</b> | 0                   | 6.42           | 6.33             | 6.04       | 5.96        | 5.93        |
|                                                       | 4                   | 7.26           | 6.08             | 5.76       | 5.05        | 4.7         |
|                                                       | 8                   | 8.33           | 5.44             | 4.66       | 4.03        | 3.8         |
|                                                       | 16                  | 10.96          | 4.78             | 3.58       | 3.13        | 2.6         |
|                                                       | 24                  | 12.03          | 4.08             | 2.95       | 2.08        | 1           |
